# Supplementary material
Source: MDPI journal article supplement (https://www.mdpi.com/2072-4292/14/8/1809)
Supplement: s1 [file s1]

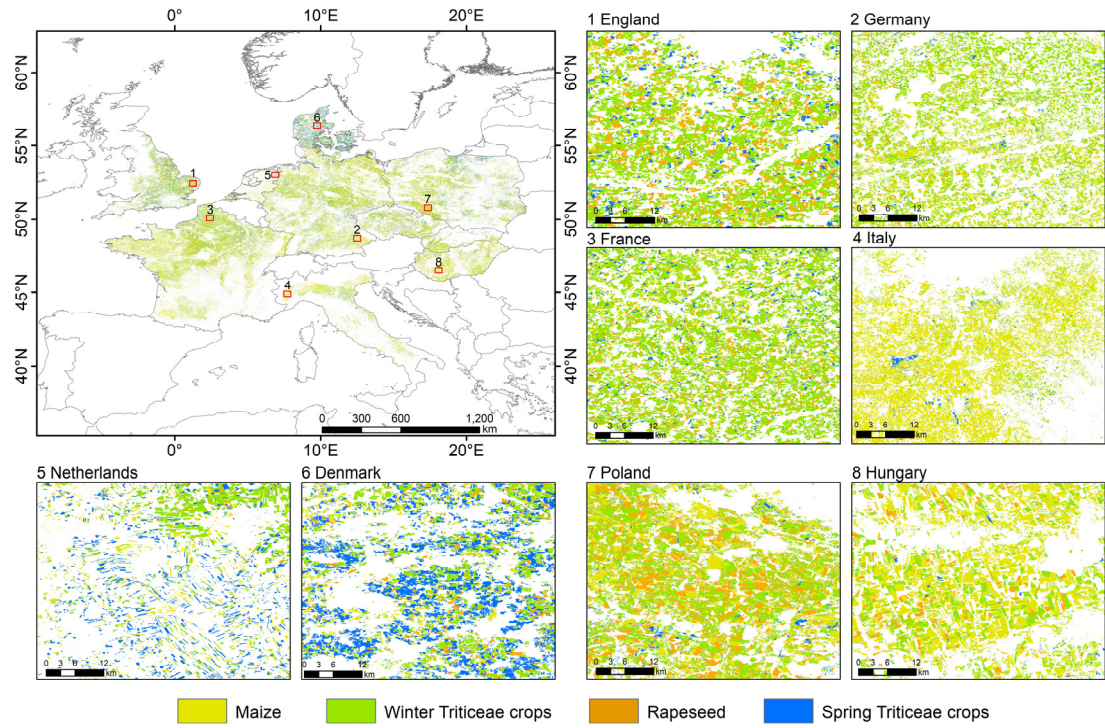

**Figure S1.** Crop maps at 10 m resolution of ten EU countries for 2018.

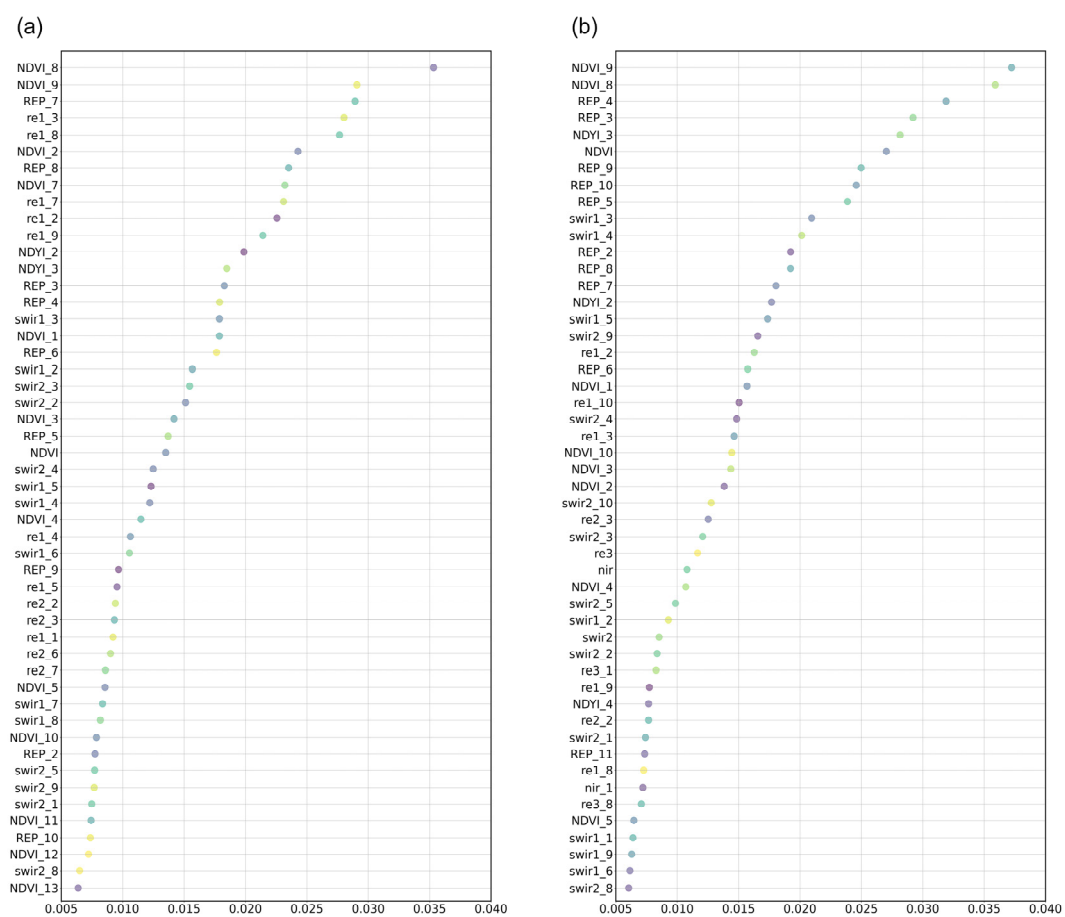

**Figure S2.** Feature importance values for the top of 50 variables from random forest models in 2018 (a) and 2019 (b).

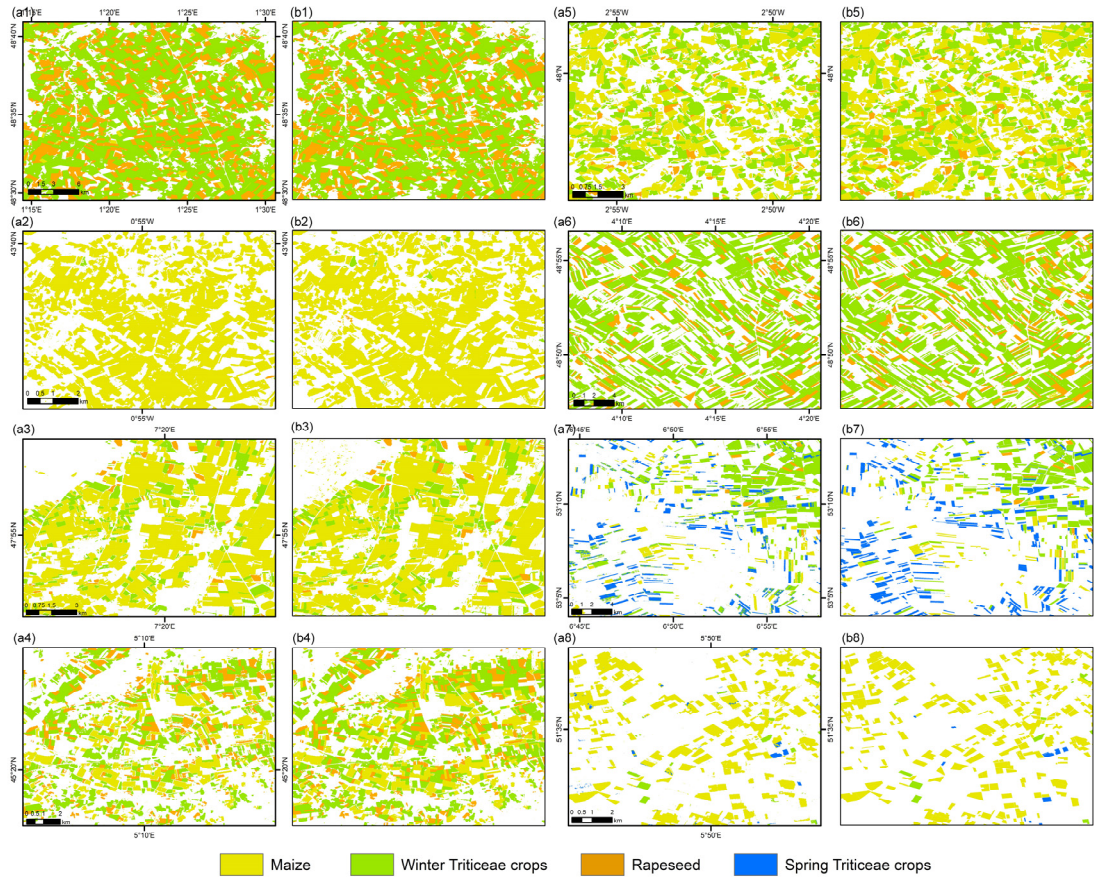

**Figure S3.** Visual comparison between our final crop maps (a1-a8) and existing reference datasets in 2018 for France (b1-b6) and Netherlands (b7-b8). For France, winter and spring Triticace crops was concluded as a single category (green color).

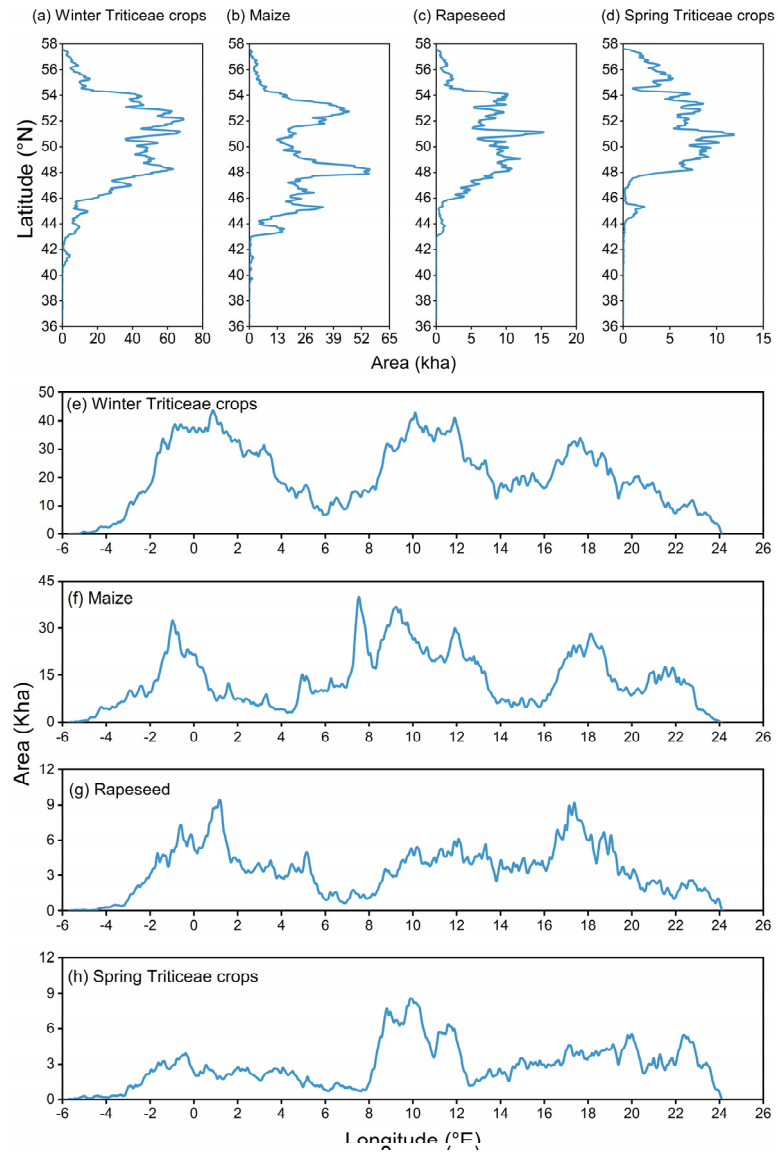

**Figure S4.** Distribution of crop area along latitude gradients (a)-(d) and longitude gradients (e-h).

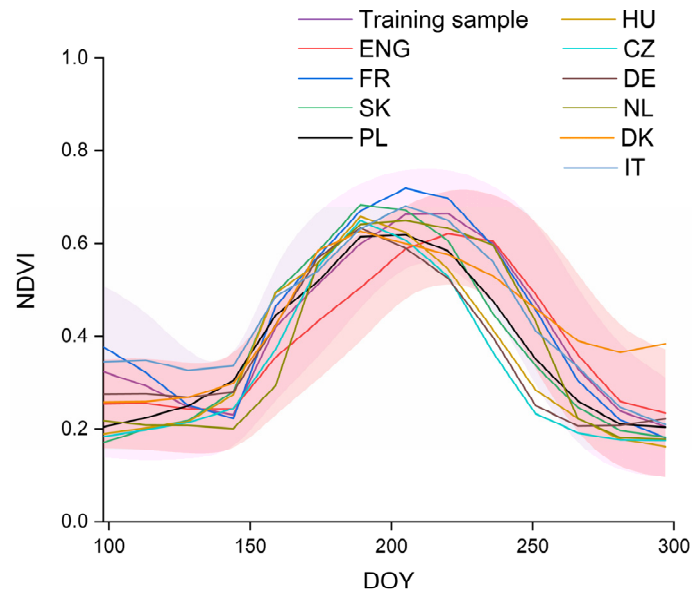

**Figure S5.** Temporal profiles of NDVI for maize of different countries. Lines depicts the mean values. Shaded area depicts error bars with one positive/negative standard deviation of maize.

Table S1. The number of Sentinel-2 images processed in this study for each country in 2018 and 2019.

| Country     | 2019  | 2018  |
|-------------|-------|-------|
| England     | 5839  | 5859  |
| France      | 14024 | 13904 |
| Netherlands | 2272  | 2299  |
| Germany     | 12154 | 12098 |
| Denmark     | 3014  | 3009  |
| Poland      | 9368  | 9393  |
| Czechia     | 3774  | 3738  |
| Slovakia    | 2570  | 2578  |
| Hungary     | 3399  | 3395  |
| Italy       | 11248 | 11346 |

Table S2. Confusion matrix of the point-based validation for England in 2019.

|                           | Others | Winter<br>Triticeae crops | Maize | Rapeseed | Spring<br>Triticeae crops | Total | UA   | F1   |
|---------------------------|--------|---------------------------|-------|----------|---------------------------|-------|------|------|
| Others                    | 3619   | 32                        | 13    | 12       | 10                        | 3686  | 0.98 | 0.98 |
| Winter<br>Triticeae crops | 55     | 728                       | 0     | 3        | 4                         | 790   | 0.92 | 0.93 |
| Maize                     | 8      | 0                         | 61    | 0        | 1                         | 70    | 0.87 | 0.84 |
| Rapeseed                  | 9      | 3                         | 0     | 181      | 2                         | 195   | 0.93 | 0.92 |
| Spring<br>Triticeae crops | 20     | 6                         | 1     | 0        | 200                       | 227   | 0.88 | 0.90 |
| Total                     | 3711   | 769                       | 75    | 196      | 217                       |       |      |      |
| PA                        | 0.98   | 0.95                      | 0.81  | 0.92     | 0.92                      |       |      |      |
| OA                        |        |                           |       |          |                           |       |      | 0.97 |

Table S3. Confusion matrix of the point-based validation for England in 2018.

|                           | Others | Winter<br>Triticeae crops | Maize | Rapeseed | Spring<br>Triticeae crops | Total | UA   | F1   |
|---------------------------|--------|---------------------------|-------|----------|---------------------------|-------|------|------|
| Others                    | 3523   | 40                        | 23    | 15       | 48                        | 3649  | 0.97 | 0.97 |
| Winter<br>Triticeae crops | 57     | 676                       | 0     | 2        | 4                         | 739   | 0.91 | 0.92 |
| Maize                     | 4      | 0                         | 62    | 0        | 0                         | 66    | 0.94 | 0.82 |
| Rapeseed                  | 8      | 4                         | 0     | 181      | 0                         | 193   | 0.94 | 0.92 |
| Spring<br>Triticeae crops | 26     | 4                         | 0     | 1        | 275                       | 306   | 0.90 | 0.87 |
| Total                     | 3618   | 724                       | 85    | 199      | 327                       |       |      |      |
| PA                        | 0.97   | 0.93                      | 0.73  | 0.91     | 0.84                      |       |      |      |
| OA                        |        |                           |       |          |                           |       |      | 0.95 |



Table S4. Confusion matrix of the point-based validation for Netherlands in 2019.

|                           | Others | Winter<br>Triticeae crops | Maize | Rapeseed | Spring<br>Triticeae crops | Total | UA   | F1   |
|---------------------------|--------|---------------------------|-------|----------|---------------------------|-------|------|------|
| Others                    | 1725   | 4                         | 15    | 2        | 12                        | 1758  | 0.98 | 0.98 |
| Winter<br>Triticeae crops | 17     | 243                       | 0     | 0        | 3                         | 263   | 0.92 | 0.93 |
| Maize                     | 9      | 0                         | 393   | 0        | 1                         | 403   | 0.98 | 0.97 |
| Rapeseed                  | 3      | 0                         | 0     | 22       | 0                         | 25    | 0.88 | 0.88 |
| Spring<br>Triticeae crops | 15     | 15                        | 0     | 1        | 154                       | 185   | 0.83 | 0.87 |
| Total                     | 1769   | 262                       | 408   | 25       | 170                       |       |      |      |
| PA                        | 0.98   | 0.93                      | 0.96  | 0.88     | 0.91                      |       |      |      |
| OA                        |        |                           |       |          |                           |       |      | 0.96 |

Table S5. Confusion matrix of the point-based validation for Netherlands in 2018.

|                           | Others | Winter<br>Triticeae crops | Maize | Rapeseed | Spring<br>Triticeae crops | Total | UA   | F1   |
|---------------------------|--------|---------------------------|-------|----------|---------------------------|-------|------|------|
| Others                    | 1707   | 5                         | 28    | 2        | 9                         | 1751  | 0.97 | 0.98 |
| Winter<br>Triticeae crops | 10     | 216                       | 0     | 0        | 14                        | 240   | 0.90 | 0.89 |
| Maize                     | 11     | 0                         | 405   | 0        | 0                         | 416   | 0.97 | 0.94 |
| Rapeseed                  | 2      | 0                         | 0     | 22       | 0                         | 24    | 0.92 | 0.90 |
| Spring<br>Triticeae crops | 14     | 24                        | 12    | 1        | 138                       | 189   | 0.73 | 0.79 |
| Total                     | 1744   | 245                       | 445   | 25       | 161                       |       |      |      |
| PA                        | 0.98   | 0.88                      | 0.91  | 0.88     | 0.86                      |       |      |      |
| OA                        |        |                           |       |          |                           |       |      | 0.95 |

Table S6. Confusion matrix of the point-based validation for France in 2019.

|                    | Others | Triticeae<br>crops | Maize | Rapeseed | Total | UA   | F1   |
|--------------------|--------|--------------------|-------|----------|-------|------|------|
| Others             | 3207   | 93                 | 83    | 28       | 3411  | 0.94 | 0.95 |
| Triticeae<br>crops | 89     | 908                | 2     | 14       | 1013  | 0.90 | 0.89 |
| Maize              | 9      | 0                  | 293   | 1        | 303   | 0.97 | 0.86 |
| Rapeseed           | 8      | 21                 | 1     | 227      | 257   | 0.88 | 0.86 |
| Total              | 3313   | 1022               | 379   | 270      |       |      |      |
| PA                 | 0.97   | 0.89               | 0.77  | 0.84     |       |      |      |
| OA                 |        |                    |       |          |       |      | 0.93 |

Table S7. Confusion matrix of the point-based validation for France in 2018.

|                 | Others | Triticeae crops | Maize | Rapeseed | Total | UA   | F1   |
|-----------------|--------|-----------------|-------|----------|-------|------|------|
| Others          | 3311   | 86              | 79    | 21       | 3497  | 0.95 | 0.96 |
| Triticeae crops | 56     | 866             | 5     | 8        | 935   | 0.93 | 0.91 |
| Maize           | 12     | 1               | 295   | 0        | 308   | 0.96 | 0.86 |
| Rapeseed        | 8      | 15              | 0     | 228      | 251   | 0.91 | 0.90 |
| Total           | 3387   | 968             | 379   | 257      |       |      |      |
| PA              | 0.98   | 0.89            | 0.78  | 0.89     |       |      |      |
| OA              |        |                 |       |          |       |      | 0.94 |

Table S8. Confusion matrix of the point-based validation for the whole study area using LUCAS data in 2018.

|                 | Others | Triticeae crops | Maize | Rapeseed | Total | UA   | F1   |
|-----------------|--------|-----------------|-------|----------|-------|------|------|
| Others          | 19702  | 1583            | 304   | 134      | 21723 | 0.91 | 0.93 |
| Triticeae crops | 659    | 4141            | 63    | 91       | 4954  | 0.84 | 0.77 |
| Maize           | 124    | 24              | 1273  | 3        | 1424  | 0.89 | 0.83 |
| Rapeseed        | 99     | 26              | 2     | 654      | 781   | 0.84 | 0.79 |
| Total           | 20584  | 5774            | 1642  | 882      |       |      |      |
| PA              | 0.96   | 0.72            | 0.78  | 0.74     |       |      |      |
| OA              |        |                 |       |          |       |      | 0.89 |
